# Supplementary material
Source: Elsevier journal article supplement (https://www.sciencedirect.com/science/article/pii/S0014256519301687)
Supplement: mmc1 [file S0014256519301687:mmc1.pdf]

**Material suplementario:****Tabla S1.** Definición de hallazgos diagnósticos y anómalos

| HALLAZGOS DIAGNÓSTICOS                            | DEFINICIÓN                                                                                   |
|---------------------------------------------------|----------------------------------------------------------------------------------------------|
| • Estenosis aórtica grave                         | Velocidad máxima del jet $\geq 4$ m/s o gradiente medio $\geq 40$ mmHg.                      |
| • Miocardiopatía hipertrófica obstructiva         | Grosor de pared $\geq 15$ mm; gradiente máximo en TSVI $\geq 30$ mmHg basal o tras Valsalva. |
| • Disfunción ventricular izquierda                | FEVI $< 50\%$                                                                                |
| • Derrame pericárdico significativo               | Severo ( $>20$ mm) o que cause taponamiento cardíaco.                                        |
| • Hipertensión pulmonar grave                     | PSAP $\geq 60$ mmHg estimada a partir del flujo de IT                                        |
| • Masa cardíaca                                   | Intracavitaria (trombo, mixoma...) o extracavitaria.                                         |
| • Disfunción grave de prótesis valvular           | Según criterios estándar.                                                                    |
| • Disección aguda de aorta                        | Imagen de desgarro intimal ( <i>flap</i> ) en aorta a cualquier nivel                        |
| <b>HALLAZGOS ANÓMALOS</b>                         |                                                                                              |
| • Hipertrofia ventricular izquierda significativa | Grosor de pared $\geq 15$ mm (sin obstrucción).                                              |
| • Prolapso valvular mitral                        | Desplazamiento sistólico hacia aurícula $\geq 2$ mm del anillo mitral o evaluación visual.   |
| • Disfunción/dilatación severa ventrículo derecho | TAPSE $< 10$ mm, diámetro basal $> 50$ mm o evaluación visual.                               |
| • Aneurisma de aorta                              | Aneurisma $> 45$ mm                                                                          |
| • Alteraciones en la contractilidad segmentaria   | Evaluación visual.                                                                           |
| • Amiloidosis cardíaca                            | Sugerido en el informe del estudio                                                           |
| • Otras valvulopatías                             | EA moderada u otras valvulopatías moderadas a graves.                                        |

**EA:** estenosis aórtica. **FEVI:** fracción de eyección ventricular. **IT:** Insuficiencia tricúspide. izquierda. **PSAP:** presión sistólica arteria pulmonar; **TAPSE:** excursión sistólica anterior del anillo tricuspídeo. **TSVI:** tracto de salida ventricular izquierdo.
